# Supplementary material
Source: PubMed Central journal article supplement (PMC7179584)
Supplement: AAC.00106-20-s0001.pdf [file AAC.00106-20-s0001.pdf]

# Supplemental information

## Fig. S1

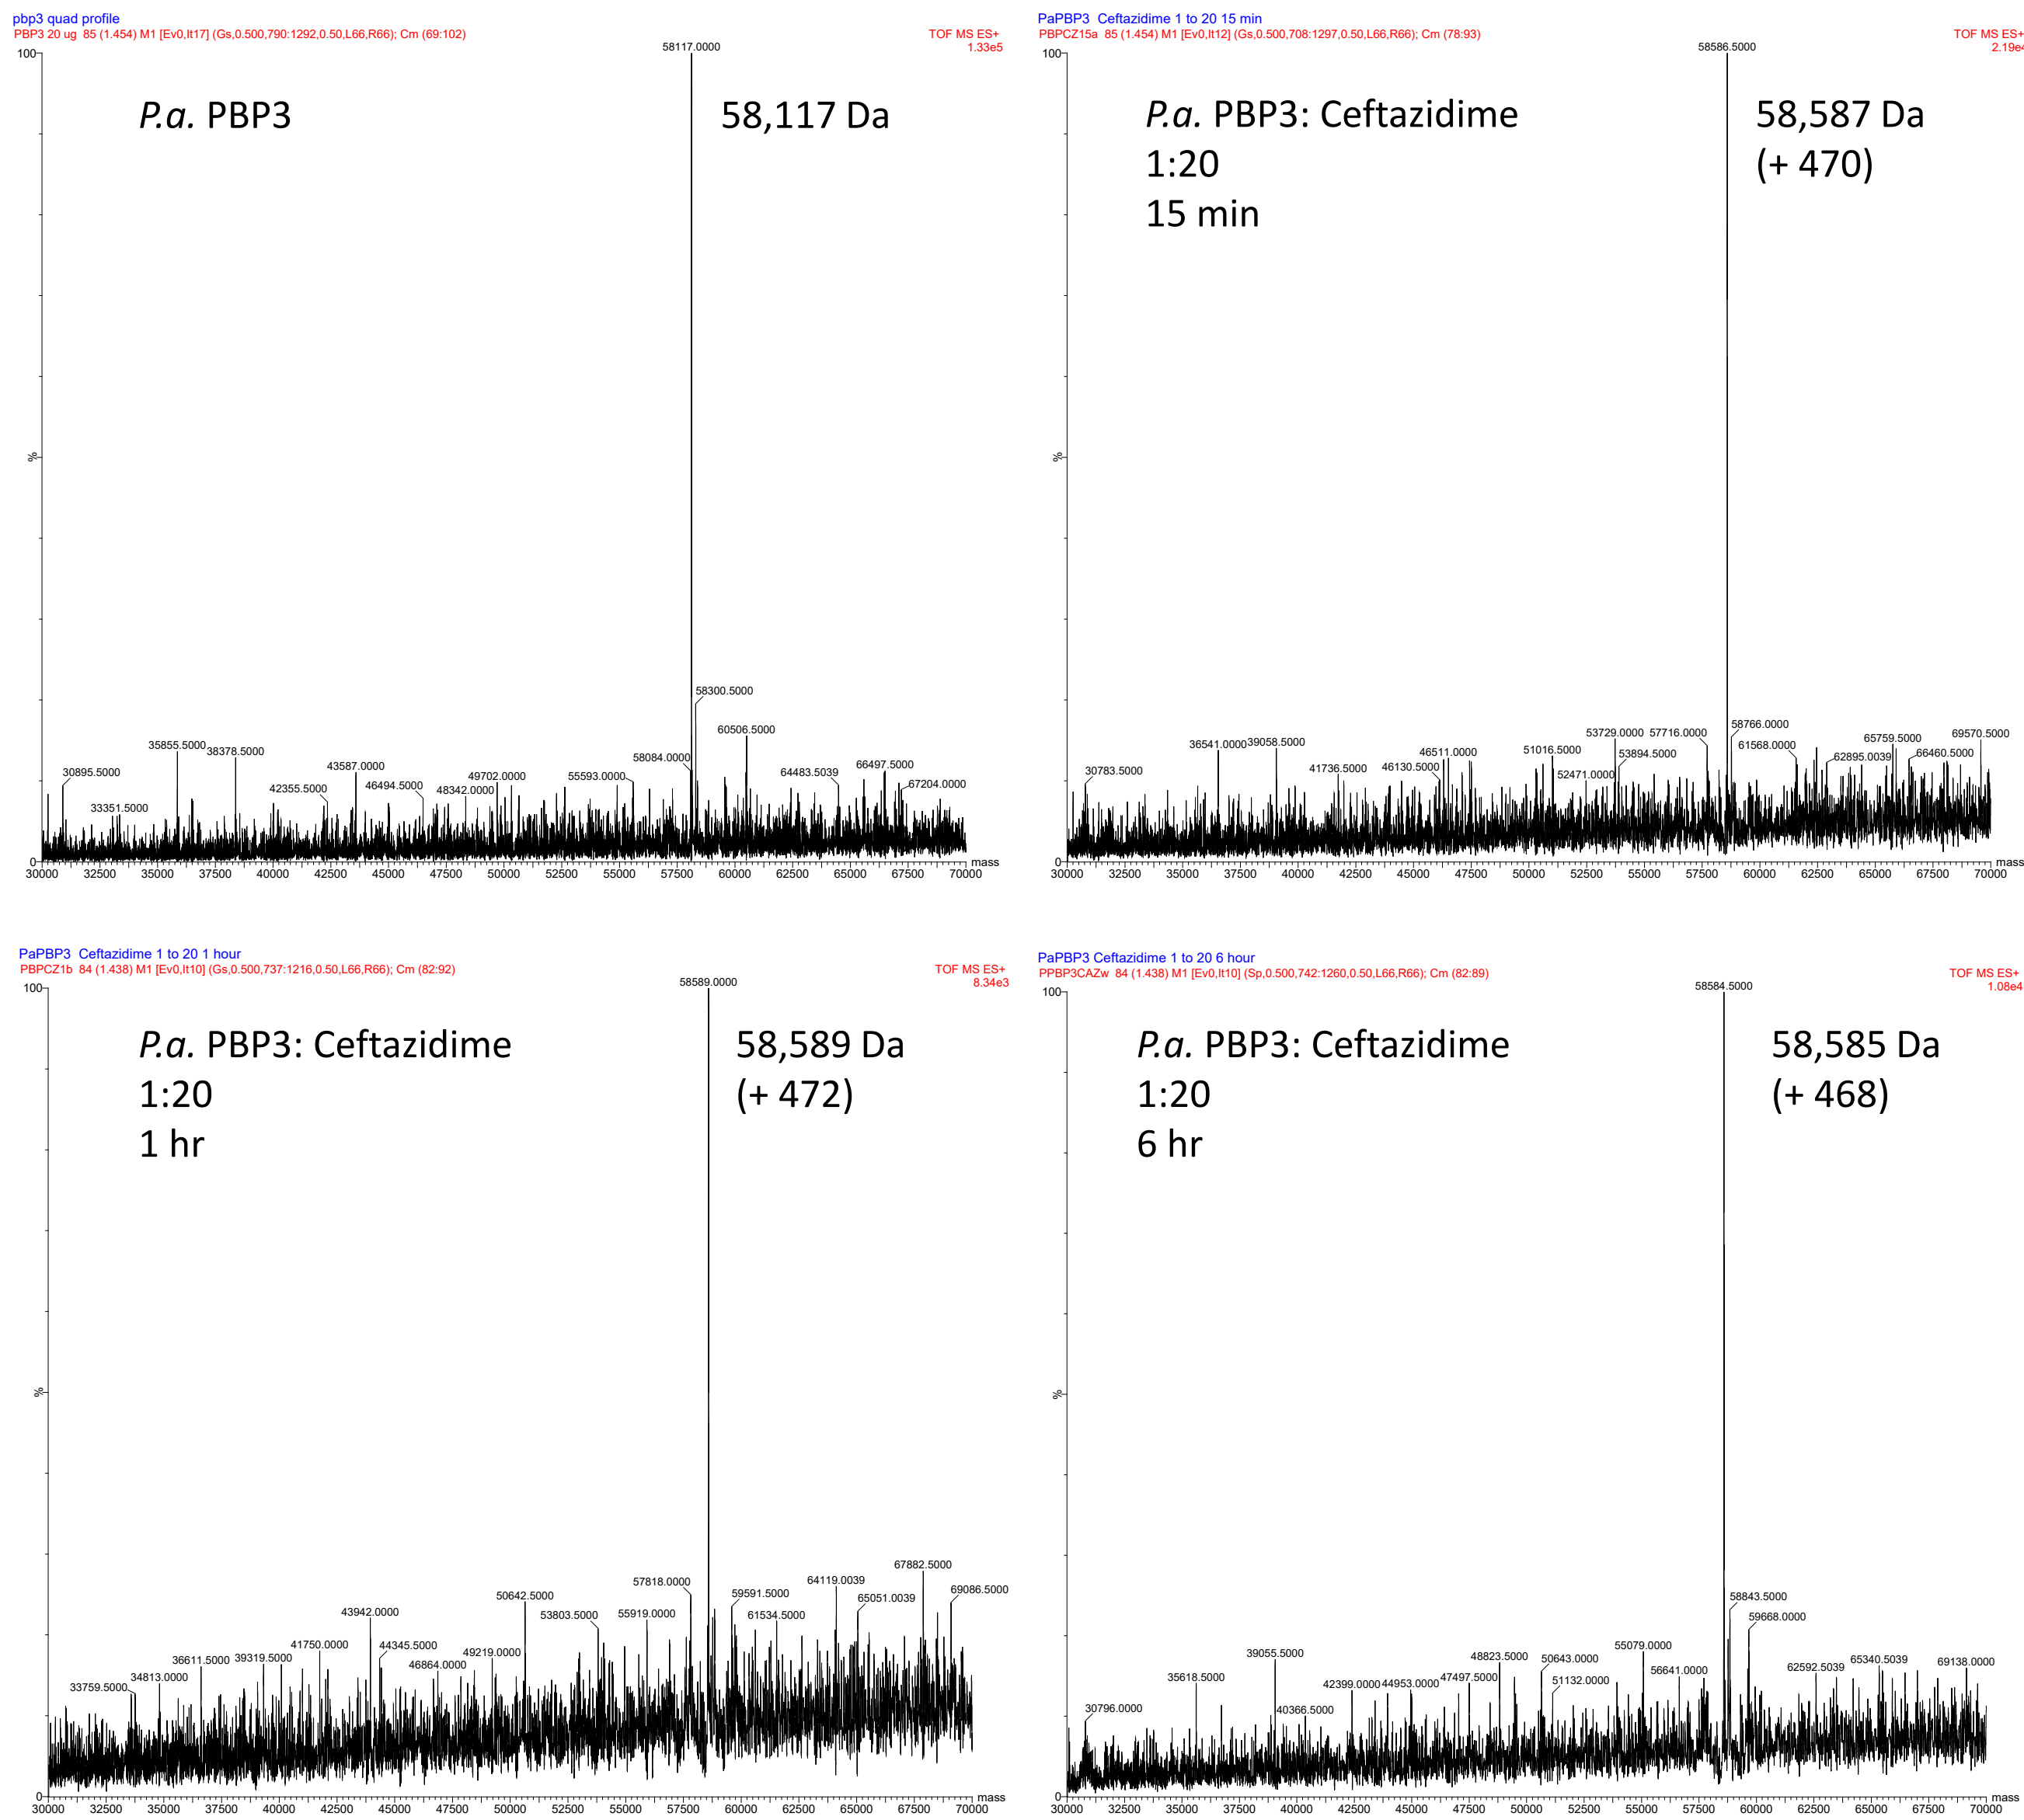

Mass spectra of *P. aeruginosa* PBP3 alone and after 15 min, 1 hr, and 6 hrs of preincubation with ceftazidime. *P. aeruginosa* PBP3/ceftazidime molar ratio is 1:20. Mass accuracy is  $\pm 5$  Da.
